# Supplementary material for: The role of genetic observatory networks in the detection and forecasting of marine non-indigenous species
Source: Research Square preprint supplement (doi:10.21203/rs.3.rs-8702791/v1), 2026-01-30
Supplement: Supplementary file 1 [file 17d02a0e817633eb0f10bf90.xlsx]

## Sheet: Sheet1
Article title	The role of genetic observatory networks in the detection and forecasting of marine non-indigenous species
Journal	Nature Communications
Authors	Justine Pagnier, Tobias Andermann, Mats Gunnar Andersson, Matthias Obst
Corresponding author	Justine Pagnier, Department of Marine Sciences, SciLifeLab, University of Gothenburg, justine.pagnier@gu.se
NOTE:	all_metro_europe = North and East Barents Sea, Northern Norway and Finnmark, Southern Norway, North and East Iceland, South and West Iceland, Faroe Plateau, North Sea, Celtic Seas, South European Atlantic Shelf, Baltic Sea, Black Sea, Adriatic Sea, Ionian Sea, Aegean Sea, Alboran Sea, Western Mediterranean, Levantine Sea, and Tunisian Plateau/Gulf of Sidra
species	ecoregions
AcartiaAcanthacartiatonsa	all_metro_europe
Amphibalanusamphitrite	all_metro_europe
Amphibalanuseburneus	all_metro_europe
Amphibalanusimprovisus	all_metro_europe
ApionsomaApionsomamisakianum	all_metro_europe
Arcuatulasenhousia	all_metro_europe
Ascidiellaaspersa	Levantine Sea
Ascidiellaaspersa	Aegean Sea
Ascidiellaaspersa	Western Mediterranean
Ascidiellaaspersa	Tunisian Plateau/Gulf of Sidra
Ascidiellaaspersa	Alboran Sea
Ascidiellaaspersa	Ionian Sea
Ascidiellaaspersa	Adriatic Sea
Asparagopsisarmata	all_metro_europe
Asparagopsistaxiformis	all_metro_europe
Aureliasolida	all_metro_europe
Austrominiusmodestus	all_metro_europe
Balanustrigonus	all_metro_europe
Boccardiaproboscidea	all_metro_europe
Bonnemaisoniahamifera	all_metro_europe
Botrylloidesviolaceus	all_metro_europe
Bugulaneritina	all_metro_europe
Caprellamutica	all_metro_europe
Caprellascaura	all_metro_europe
Celleporariabrunnea	all_metro_europe
Cercopagispengoi	all_metro_europe
Corambeobscura	all_metro_europe
Cordylophoracaspia	all_metro_europe
Corellaeumyota	all_metro_europe
Crepidulafornicata	all_metro_europe
Cutleriamultifida	Levantine Sea
Cutleriamultifida	Aegean Sea
Cutleriamultifida	Western Mediterranean
Cutleriamultifida	Tunisian Plateau/Gulf of Sidra
Cutleriamultifida	Alboran Sea
Cutleriamultifida	Ionian Sea
Cutleriamultifida	Adriatic Sea
Dasysiphoniajaponica	all_metro_europe
Ensisdirectus	all_metro_europe
Ensisleei	all_metro_europe
Evadneanonyx	all_metro_europe
Fenestrulinadelicia	all_metro_europe
Fibrocapsajaponica	all_metro_europe
Ficopomatusenigmaticus	all_metro_europe
Gammarustigrinus	all_metro_europe
Gonionemusvertens	all_metro_europe
Haloajaponica	all_metro_europe
Haminellasolitaria	all_metro_europe
Hemigrapsustakanoi	all_metro_europe
Herdmaniamomus	all_metro_europe
Hydroideselegans	all_metro_europe
Juxtacribrilinamutabilis	all_metro_europe
Marenzelleriaarctia	all_metro_europe
Marenzellerianeglecta	all_metro_europe
Marenzelleriaviridis	all_metro_europe
Melanothamnusharveyi	all_metro_europe
Mnemiopsisleidyi	all_metro_europe
Monocorophiumacherusicum	Baltic Sea
Monocorophiumsextonae	all_metro_europe
Neogobiusmelanostomus	all_metro_europe
Oithonadavisae	all_metro_europe
Ostreopsisovata	all_metro_europe
Palaemonelegans	Baltic Sea
Paracerceissculpta	all_metro_europe
Paranthurajaponica	all_metro_europe
Perophorajaponica	all_metro_europe
Petricolariapholadiformis	all_metro_europe
Pleurosiralaevis	Baltic Sea
Polydoracornuta	all_metro_europe
Polydorawebsteri	all_metro_europe
Polysiphoniabrodiei	Baltic Sea
Potamopyrgusantipodarum	all_metro_europe
Pseudocalanusacuspes	all_metro_europe
Pseudocalanusmimus	all_metro_europe
Pseudodiaptomusmarinus	all_metro_europe
Rangiacuneata	all_metro_europe
Rhithropanopeusharrisii	all_metro_europe
Rhodochortontenue	all_metro_europe
Schizoporellajaponica	all_metro_europe
Sinelobusvanhaareni	all_metro_europe
Streblospiobenedicti	all_metro_europe
Telmatogetonjaponicus	all_metro_europe
Thalassiosirapunctigera	all_metro_europe
Tharyxsetigera	all_metro_europe
Torquigenerflavimaculosus	all_metro_europe
Xenostrobussecuris	all_metro_europe
