# Supplementary material for: The role of genetic observatory networks in the detection and forecasting of marine non-indigenous species
Source: Research Square preprint supplement (doi:10.21203/rs.3.rs-8702791/v1), 2026-01-30
Supplement: Supplementary file 2 [file 6cd77f4ee12df5d02bbc7b3f.xlsx]

## Sheet: raw unpublished detections
Article title	The role of genetic observatory networks in the detection and forecasting of marine non-indigenous species
Journal	Nature Communications
Authors	Justine Pagnier, Tobias Andermann, Mats Gunnar Andersson, Matthias Obst
Corresponding author	Justine Pagnier, Department of Marine Sciences, SciLifeLab, University of Gothenburg, justine.pagnier@gu.se
latitude	longitude	Year	Program	Event	Site	Observatory	AcartiaAcanthacartiatonsa	Amphibalanusamphitrite	Amphibalanuseburneus	Amphibalanusimprovisus	ApionsomaApionsomamisakianum	Arcuatulasenhousia	Ascidiellaaspersa	Asparagopsisarmata	Aureliasolida	Austrominiusmodestus	Balanustrigonus	Boccardiaproboscidea	Bonnemaisoniahamifera	Botrylloidesviolaceus	Bugulaneritina	Caprellamutica	Caprellascaura	Cordylophoracaspia	Corellaeumyota	Crepidulafornicata	Cutleriamultifida	Dasysiphoniajaponica	Fenestrulinadelicia	Fibrocapsajaponica	Ficopomatusenigmaticus	Gammarustigrinus	Haloajaponica	Hemigrapsustakanoi	Hydroideselegans	Juxtacribrilinamutabilis	Marenzelleriaarctia	Marenzellerianeglecta	Marenzelleriaviridis	Melanothamnusharveyi	Mnemiopsisleidyi	Monocorophiumsextonae	Neogobiusmelanostomus	Ostreopsisovata	Palaemonelegans	Paracerceissculpta	Perophorajaponica	Petricolariapholadiformis	Polydoracornuta
59.8415	23.2489	2020	ARMSMBON	Angbat_20200608_20201117	Angbat	TZS	0	0	0	1	0	0	0	0	0	0	0	0	0	0	0	0	0	0	0	0	0	0	0	0	0	0	0	0	0	0	0	0	0	0	0	0	0	0	0	0	0	0	0
48.7287	-3.95894	2018	ARMSMBON	BasBloS1_20180711_20181025	BasBloS1	BelgiumCoast	0	0	0	0	1	0	1	0	0	1	1	0	1	0	0	0	0	0	1	1	0	0	0	0	0	0	0	0	1	0	0	0	0	0	0	0	0	0	0	0	0	0	0
51.6482	2.53583	2021	ARMSMBON	BirkenfelsA_20200617_20210309	BirkenfelsA	BelgiumCoast	0	0	0	0	0	0	0	0	0	0	0	0	0	0	0	0	0	0	0	0	0	0	0	0	0	0	0	0	0	0	0	0	0	0	0	0	0	0	0	0	0	0	0
51.1149	2.57858	2021	ARMSMBON	CoastbustersA_20210422_20211008	CoastbustersA	BelgiumCoast	0	0	0	1	0	0	0	0	0	1	0	0	0	0	0	0	0	0	0	1	0	0	0	0	0	0	0	0	0	0	0	0	0	0	0	0	0	0	0	0	0	1	0
43.3385	-3.01483	2020	ARMSMBON	G1_20200624_20201103	G1	Getxo	0	0	1	0	0	0	1	0	0	1	1	0	0	0	1	0	1	0	1	0	0	0	0	0	1	0	0	1	0	0	0	0	0	0	0	0	0	0	0	0	0	0	0
43.3385	-3.01491	2020	ARMSMBON	G2_20200624_20201103	G2	Getxo	0	0	0	1	0	0	0	0	0	0	0	0	0	0	0	0	0	0	1	0	0	0	0	0	1	0	0	0	0	0	0	0	0	0	0	0	0	0	0	0	0	0	0
57.6808	11.7283	2020	ARMSMBON	Gbg4_20200206_20200529	Gbg4	SWC	0	0	0	0	0	0	0	0	0	0	0	0	1	0	0	0	0	0	0	0	0	0	0	0	0	0	0	0	0	0	0	0	0	0	0	0	0	0	0	0	0	0	0
56.9016	9.05517	2021	ARMSMBON	Green33_20201110_20211115	Green33	Limfjord	0	0	0	0	0	0	1	0	0	0	0	0	0	0	0	1	0	0	0	0	0	1	0	1	0	0	0	0	0	0	0	0	0	0	0	0	0	0	0	0	0	0	1
53.3157	-9.67028	2021	ARMSMBON	Gurr1_20200721_20210708	Gurr1	Galway	0	0	0	0	0	0	0	0	0	0	0	0	1	0	0	0	0	0	0	0	0	1	0	0	0	0	0	0	0	0	0	0	0	0	0	0	0	0	0	0	1	0	0
53.3157	-9.66854	2021	ARMSMBON	Gurr2_20200721_20210707	Gurr2	Galway	0	0	0	0	0	0	0	1	0	0	0	0	1	0	0	0	0	0	1	0	0	1	0	0	0	0	0	0	0	0	0	0	0	0	0	0	0	0	0	0	1	0	0
53.3154	-9.67156	2021	ARMSMBON	Gurr3_20200723_20210708	Gurr3	Galway	0	0	0	0	0	0	0	0	0	0	0	0	0	0	0	0	0	0	0	0	0	0	0	0	0	0	0	0	0	0	0	0	0	0	0	0	0	0	0	0	1	0	0
59.8644	23.2651	2020	ARMSMBON	Kummelkobben_20200608_20201120	Kummelkobben	TZS	0	0	0	1	0	0	0	0	0	0	0	0	0	0	0	0	0	0	0	0	0	0	0	0	0	0	0	0	0	0	0	0	0	0	0	0	0	0	0	0	0	0	0
45.5649	13.7436	2021	ARMSMBON	LukaKP_20210223_20210622	LukaKP	GulfofPiran	0	0	0	0	0	0	0	0	1	0	0	0	0	0	1	0	0	0	0	0	0	0	0	0	0	0	0	0	1	0	0	0	0	0	0	1	0	0	0	0	0	0	0
45.5649	13.7436	2021	ARMSMBON	LukaKP_20210622_20211027	LukaKP	GulfofPiran	0	1	0	0	0	0	0	0	1	0	0	0	0	0	1	0	1	0	0	0	0	0	0	0	0	0	0	0	1	0	0	0	0	0	0	0	0	0	0	0	0	0	0
57.9035	11.5816	2020	ARMSMBON	Marstrand2_20200228_20200527	Marstrand2	SWC	1	0	0	0	0	0	0	0	0	0	0	0	1	0	0	0	0	0	0	0	0	0	0	0	0	0	0	0	0	0	0	0	0	0	0	0	0	0	0	0	0	0	0
50.3668	-4.1561	2020	ARMSMBON	MBA1B_20200717_20200922	MBA1B	Plymouth	0	0	0	0	0	0	0	0	0	1	0	0	0	1	1	0	0	0	0	0	1	0	0	0	0	0	0	0	1	0	0	0	0	0	0	0	0	0	0	0	0	0	0
58.3533	11.4349	2020	ARMSMBON	Preemraff1_20200401_20200715	Preemraff1	SWC	0	0	0	1	0	0	0	0	0	0	0	0	1	0	0	1	0	0	0	0	0	1	0	0	0	0	0	0	0	0	0	0	0	0	0	0	0	0	0	0	0	0	0
58.3541	11.4339	2020	ARMSMBON	Preemraff2_20200401_20200715	Preemraff2	SWC	1	0	0	1	0	0	0	0	0	0	0	0	1	0	0	1	0	0	0	0	0	1	0	0	0	0	0	0	0	0	0	0	0	0	0	0	0	0	0	0	0	0	1
44.4215	12.2095	2021	ARMSMBON	RavH1_20210422_20210722	RavH1	RavennaH	0	0	1	1	0	0	0	0	0	0	0	0	0	0	0	0	0	0	0	0	0	0	0	0	1	0	0	0	0	0	0	0	0	0	0	0	0	0	0	0	0	0	1
44.4215	12.2095	2021	ARMSMBON	RavH2_20210422_20210722	RavH2	RavennaH	0	0	1	1	0	1	0	0	0	0	0	0	0	0	0	0	0	0	0	0	0	0	0	0	1	0	0	0	1	0	0	0	0	0	0	0	0	0	0	0	0	0	1
44.4924	12.2876	2021	ARMSMBON	RavM1_20210422_20210722	RavM1	RavennaH	0	0	0	1	0	1	1	0	1	0	0	0	0	0	1	0	1	0	0	0	1	0	0	0	0	0	1	0	1	0	0	0	0	0	0	0	0	0	0	1	0	0	0
44.4924	12.2876	2021	ARMSMBON	RavM2_20210422_20210722	RavM2	RavennaM	0	1	0	1	0	0	1	0	1	0	0	0	0	0	1	0	1	0	0	0	1	0	0	0	0	0	1	0	1	0	0	0	0	0	0	0	0	0	0	1	0	0	0
44.4924	12.2876	2021	ARMSMBON	RavM3_20210422_20210722	RavM3	RavennaM	0	0	0	0	0	0	1	0	1	0	0	0	0	0	1	0	1	0	0	0	1	0	0	0	0	0	1	0	1	0	0	0	0	0	0	0	0	0	0	0	0	0	0
58.8752	11.1032	2021	ARMSMBON	VH1_20200716_20210608	VH1	Koster	1	0	0	0	0	0	0	0	0	0	0	0	1	0	0	0	0	0	0	1	0	1	1	0	0	0	0	0	0	0	0	0	0	0	0	0	0	0	0	0	0	0	0
58.8763	11.1119	2021	ARMSMBON	VH2_20200716_20210608	VH2	Koster	1	0	0	0	0	0	0	0	0	0	0	0	1	0	0	0	0	0	0	0	0	1	1	1	0	0	0	0	0	0	0	0	0	0	0	0	0	0	0	0	0	0	0
58.8599	11.0805	2021	ARMSMBON	VH3_20200716_20210608	VH3	Koster	1	0	0	1	0	0	0	0	0	0	0	0	1	0	0	0	0	0	0	0	0	1	1	1	0	0	0	0	0	0	0	0	0	0	0	0	0	0	0	0	0	0	0
56.9013	9.05733	2021	ARMSMBON	Yellow8_20201110_20211115	Yellow8	Limfjord	0	0	0	0	0	0	1	0	0	0	0	0	0	0	0	1	0	0	0	0	0	1	1	1	0	0	0	0	0	0	0	0	0	0	0	0	0	0	0	0	0	0	1
35.3432	25.1366	2021	ARMSMBON	1HERP_20200903_20210122	1HERP	Crete	0	0	0	1	0	0	0	0	0	0	0	0	0	0	0	0	0	0	0	0	0	0	1	0	0	0	0	0	0	0	0	0	0	0	0	0	0	0	0	0	0	0	1
51.6497	2.78937	2021	ARMSMBON	AJJCD89_20210225_20210819	AJJCD89	BelgiumCoast	0	0	0	0	0	0	0	0	0	0	0	0	0	0	0	0	0	0	0	1	0	0	0	0	0	0	0	0	0	0	0	0	0	0	0	0	0	0	0	0	0	0	0
57.718	11.68	2020	ARMSMBON	Bjorko1_20200131_20200518	Bjorko1	SWC	1	0	0	0	0	0	0	0	0	0	0	0	0	0	0	0	0	0	0	0	0	0	0	0	0	0	0	0	0	0	0	0	0	0	0	0	0	0	0	0	0	0	0
45.5487	13.5507	2021	ARMSMBON	BojaVida_20200611_20210728	BojaVida	GulfofPiran	0	0	0	0	0	0	0	0	0	0	0	0	0	0	0	0	0	0	0	0	0	0	0	0	0	0	0	0	0	0	0	0	0	0	0	1	0	0	0	0	0	0	0
43.3384	-3.01483	2020	ARMSMBON	G3_20200624_20201103	G3	Getxo	0	0	0	0	0	0	0	0	0	1	1	0	0	0	0	0	0	0	0	0	0	0	0	0	0	0	0	0	0	0	0	0	0	0	0	0	0	0	0	0	0	0	0
57.6648	11.7147	2020	ARMSMBON	Gbg1_20200206_20200520	Gbg1	SWC	0	0	0	0	0	0	0	0	0	0	0	0	1	0	0	0	0	0	0	0	0	0	0	0	0	0	0	0	0	0	0	0	0	0	0	0	0	0	0	0	0	0	0
57.6805	11.7406	2020	ARMSMBON	Gbg3_20200206_20200529	Gbg3	SWC	0	0	0	0	0	0	0	0	0	0	0	0	1	0	0	0	0	0	0	0	0	0	0	0	0	0	0	0	0	0	0	0	0	0	0	0	0	0	0	0	0	0	0
56.0263	12.6957	2020	ARMSMBON	Helsingborg1_20200305_20200604	Helsingborg1	SWC	0	0	0	1	0	0	0	0	0	0	0	0	0	0	0	0	0	0	0	0	0	0	0	0	0	0	0	0	0	0	0	0	0	0	0	0	0	0	1	0	0	0	0
56.0181	12.7005	2020	ARMSMBON	Helsingborg2_20200305_20200604	Helsingborg2	SWC	1	0	0	1	0	0	0	0	0	0	0	0	0	0	0	0	0	0	0	0	0	0	0	0	0	0	0	0	0	0	0	0	0	0	0	0	0	0	0	0	0	0	0
57.7032	11.7114	2020	ARMSMBON	Hjuvik1_20200131_20200518	Hjuvik1	SWC	0	0	0	1	0	0	0	0	0	0	0	0	0	0	0	0	0	0	0	0	0	0	0	0	0	0	0	0	0	0	0	0	0	0	0	0	0	0	0	0	0	0	1
57.9144	11.5942	2020	ARMSMBON	Marstrand1_20200228_20200527	Marstrand1	SWC	1	0	0	0	0	0	0	0	0	0	0	0	0	0	0	0	0	0	0	0	0	0	0	0	0	0	0	0	0	0	0	0	0	0	0	0	0	0	0	0	0	0	0
57.8893	11.5857	2020	ARMSMBON	Marstrand3_20200228_20200527	Marstrand3	SWC	1	0	0	0	0	0	0	0	0	0	0	0	0	0	0	1	0	0	0	0	0	1	0	0	0	0	0	0	0	0	0	0	0	0	0	0	0	0	0	0	0	0	0
50.3673	-4.1554	2020	ARMSMBON	MBA1A_20200717_20200921	MBA1A	Plymouth	0	0	0	0	0	0	1	0	0	1	0	0	0	1	1	0	0	0	0	0	1	0	0	0	0	0	0	0	0	0	0	0	0	0	0	1	0	0	0	0	0	0	1
50.3674	-4.1544	2020	ARMSMBON	MBA1C_20200717_20200923	MBA1C	Plymouth	0	0	0	0	0	0	0	0	0	1	0	1	0	1	1	0	0	0	0	0	0	1	0	0	0	0	0	0	0	0	0	0	0	0	0	1	0	0	0	0	0	0	0
44.4215	12.2095	2021	ARMSMBON	RavH3_20210422_20210722	RavH3	RavennaH	0	0	1	1	0	1	0	0	0	0	0	0	0	0	0	0	0	0	0	0	0	0	0	0	1	0	0	0	0	0	0	0	0	0	0	0	0	0	0	0	0	0	1
56.8999	9.05663	2021	ARMSMBON	Red2_20201110_20211115	Red2	Limfjord	0	0	0	0	0	0	0	0	0	0	0	0	0	0	0	1	0	0	0	0	0	0	1	0	0	0	0	0	0	0	0	0	0	0	0	0	0	0	0	0	0	0	1
59.8109	23.2062	2020	ARMSMBON	Spikarna_20200608_20201118	Spikarna	TZS	0	0	0	1	0	0	0	0	0	0	0	0	0	0	0	0	0	0	0	0	0	0	0	0	0	0	0	0	0	0	0	0	0	0	0	0	0	0	0	0	0	0	0
42.2284	-8.7787	2020	ARMSMBON	TorallaA_20200706_20201006	TorallaA	Toralla	0	0	0	0	0	0	0	0	0	0	1	0	0	0	0	0	0	0	0	0	0	0	0	0	0	0	0	0	0	0	0	0	0	0	0	1	0	0	0	0	0	0	0
42.2284	-8.7787	2020	ARMSMBON	TorallaB_20200706_20201006	TorallaB	Toralla	0	0	0	0	0	0	0	0	0	0	1	0	0	0	0	0	0	0	0	1	1	0	0	0	0	0	0	0	0	0	0	0	0	0	0	0	0	0	0	0	0	0	0
42.2284	-8.7787	2020	ARMSMBON	TorallaC_20200706_20201006	TorallaC	Toralla	0	0	0	0	0	0	0	0	0	0	1	0	0	0	0	0	0	0	0	1	1	0	0	0	0	0	0	0	0	0	0	0	0	0	0	1	0	0	0	0	0	0	0
57.1134	12.23	2020	ARMSMBON	Varberg1_20200213_20200603	Varberg1	TZS	1	0	0	1	0	0	0	0	0	0	0	0	0	0	0	0	0	0	0	0	0	0	0	0	0	0	0	0	0	0	0	0	0	0	0	0	0	0	0	0	0	0	1
57.1126	12.2303	2020	ARMSMBON	Varberg2_20200213_20200603	Varberg2	TZS	0	0	0	1	0	0	0	0	0	0	0	0	0	0	0	0	0	0	0	0	0	0	0	0	0	0	0	0	0	0	0	0	0	0	0	0	0	0	0	0	0	0	1
57.1107	12.244	2020	ARMSMBON	Varberg3_20200213_20200603	Varberg3	TZS	1	0	0	0	0	0	0	0	0	0	0	0	0	0	0	0	0	0	0	0	0	0	0	0	0	0	0	0	0	0	0	0	0	0	0	0	0	0	0	0	0	0	1
56.1684	15.5924	2025	SPM	NA	Karlskrona	NA	1	0	0	1	0	0	0	0	0	0	0	0	0	0	0	0	0	1	0	0	0	0	0	0	0	0	0	0	0	0	0	1	0	0	0	0	0	0	0	0	0	0	1
56.6583	12.8497	2025	SPM	NA	Halmstad	NA	1	0	0	1	0	0	0	0	0	0	0	0	0	0	0	0	0	1	0	0	0	0	0	0	0	0	0	0	0	0	0	1	0	0	0	0	0	0	0	0	0	0	1
56.6636	16.3731	2025	SPM	NA	Kalmar	NA	1	0	0	1	0	0	0	0	0	0	0	0	0	0	0	0	0	1	0	0	0	0	0	0	0	0	0	0	0	0	0	1	0	0	0	0	0	0	0	0	0	0	1
57.1106	12.2419	2025	SPM	NA	Varberg	NA	1	0	0	1	0	0	0	0	0	0	0	0	0	0	0	0	0	1	0	0	0	0	0	0	0	0	0	0	0	0	0	1	0	0	0	0	0	0	0	0	0	0	1
57.2614	16.4836	2025	SPM	NA	Oskarshamn	NA	1	0	1	1	0	0	0	0	0	0	0	0	0	0	0	0	0	1	0	0	0	0	0	0	0	0	0	0	0	0	0	1	0	0	0	0	0	0	0	0	0	0	1
57.6355	18.2815	2025	SPM	NA	Visby	NA	1	0	0	1	0	0	0	0	0	0	0	0	0	0	0	0	0	1	0	0	0	0	0	0	0	0	0	0	0	0	0	1	0	0	1	0	0	0	0	0	0	0	1
57.7065	18.8093	2025	SPM	NA	Slite	NA	1	0	0	1	0	0	0	0	0	0	0	0	0	0	0	0	0	1	0	0	0	0	0	0	0	0	0	0	0	0	0	1	0	0	0	0	0	0	0	0	0	0	1
58.2501	11.4456	2025	SPM	NA	Kristineberg	NA	1	0	0	1	0	0	0	0	0	0	0	0	0	0	0	0	0	0	0	0	0	0	0	0	0	0	0	0	0	0	0	1	0	0	0	0	0	0	0	0	0	0	1
58.6626	17.0994	2025	SPM	NA	Oxelosund	NA	1	0	0	1	0	0	0	0	0	0	0	0	0	0	0	0	0	1	0	0	0	0	0	0	0	0	0	0	0	0	0	1	0	0	0	0	0	0	0	0	0	0	1
58.875	11.1442	2025	SPM	NA	Saltö	NA	1	0	0	1	0	0	0	0	0	0	0	0	0	0	0	0	0	0	0	1	0	0	0	0	0	0	0	0	0	0	0	0	0	0	0	0	0	0	0	0	0	0	1
65.5483	22.2363	2023	SPM	NA	Lulea	NA	1	0	0	1	0	0	0	0	0	0	0	0	0	0	0	0	0	0	0	0	0	0	0	0	0	1	0	0	0	0	1	0	0	0	0	0	0	0	0	0	0	0	0
65.2338	21.6299	2023	SPM	NA	Pitea	NA	1	0	0	1	0	0	0	0	0	0	0	0	0	0	0	0	0	0	0	0	0	0	0	0	0	1	0	0	0	0	1	1	0	0	1	0	0	0	0	0	0	0	0
64.6846	21.2236	2023	SPM	NA	Skeleftea	NA	1	0	0	1	0	0	0	0	0	0	0	0	0	0	0	0	0	0	0	0	0	0	0	0	0	1	0	0	0	0	1	0	0	0	1	0	0	0	0	0	0	0	0
58.005	11.7016	2022	SPM	NA	Wallhamn	NA	0	0	0	1	0	0	0	0	0	0	0	0	0	0	0	0	0	0	0	1	0	0	0	1	0	0	0	0	0	0	0	0	0	1	1	0	1	1	0	0	0	0	0
58.8992	17.9537	2023	SPM	NA	Nynashamn	NA	1	0	0	1	0	0	0	0	0	0	0	0	0	0	0	0	0	1	0	0	0	0	0	0	0	0	0	0	0	0	0	0	1	0	0	0	0	0	0	0	0	0	0
59.2973	18.6498	2023	SPM	NA	Bullando	NA	1	0	0	1	0	0	0	0	0	0	0	0	0	0	0	0	0	1	0	0	0	0	0	0	0	0	0	0	0	1	1	0	0	0	0	0	0	0	0	0	0	0	0
59.1675	17.6697	2023	SPM	NA	Sodertalje	NA	1	0	0	1	0	0	0	0	0	0	0	0	0	0	0	0	0	1	0	0	0	0	0	0	0	1	0	0	0	0	1	1	1	0	0	0	0	0	0	0	0	0	0
							27	2	5	36	1	3	8	1	5	7	6	1	12	3	9	6	5	11	4	8	7	11	6	5	5	4	3	1	8	1	5	11	2	1	4	6	1	1	1	2	3	1	23
[truncated: 8 more columns]

## Sheet: analysis results per species
Article title	The role of genetic observatory networks in the detection and forecasting of marine non-indigenous species
Journal	Nature Communications
Authors	Justine Pagnier, Tobias Andermann, Mats Gunnar Andersson, Matthias Obst
Corresponding author	Justine Pagnier, Department of Marine Sciences, SciLifeLab, University of Gothenburg, justine.pagnier@gu.se
species	Number of detections	Mean suitability at detection locations	Median suitability	SD suitability	min suitability	max suitability	percentage above 0.5	percentage above 0.8
Austrominiusmodestus	7	0.9062	0.916	0.013646	0.888	0.916	100	100
Corellaeumyota	4	0.8885	0.8885	0.012021	0.88	0.897	100	100
Petricolariapholadiformis	1	0.886	0.886	NA	0.886	0.886	100	100
Asparagopsisarmata	1	0.883	0.883	NA	0.883	0.883	100	100
Bugulaneritina	9	0.87	0.87	0	0.87	0.87	100	100
Balanustrigonus	6	0.861	0.872	0.022	0.828	0.872	100	100
Dasysiphoniajaponica	11	0.849222	0.848	0.029303	0.808	0.894	100	100
Botrylloidesviolaceus	3	0.848	0.848	0	0.848	0.848	100	100
Bonnemaisoniahamifera	12	0.8459	0.831	0.025528	0.827	0.902	100	100
Gammarustigrinus	4	0.824	0.824	0.002828	0.822	0.826	100	100
Caprellamutica	6	0.81775	0.8265	0.019311	0.789	0.829	100	75
Amphibalanusimprovisus	36	0.811421	0.849	0.117515	0.579	0.92	100	73.6842
Schizoporellajaponica	2	0.794	0.794	0	0.794	0.794	100	0
Perophorajaponica	3	0.793	0.793	0	0.793	0.793	100	0
Hydroideselegans	8	0.786	0.786	0.011314	0.778	0.794	100	0
Marenzelleriaviridis	2	0.782	0.782	NA	0.782	0.782	100	0
Thalassiosirapunctigera	2	0.779	0.779	0.042426	0.749	0.809	100	50
Potamopyrgusantipodarum	5	0.77875	0.868	0.212167	0.463	0.916	75	75
Monocorophiumsextonae	6	0.7776	0.768	0.136229	0.562	0.895	100	40
Boccardiaproboscidea	1	0.761	0.761	NA	0.761	0.761	100	0
Crepidulafornicata	8	0.741857	0.851	0.178549	0.495	0.915	71.4286	57.1429
Cordylophoracaspia	11	0.727167	0.7665	0.122509	0.493	0.83	83.3333	16.6667
Fibrocapsajaponica	5	0.71075	0.714	0.010905	0.696	0.719	100	0
Marenzelleriaarctia	5	0.701	0.687	0.03422	0.676	0.74	100	0
Polydoracornuta	23	0.684357	0.729	0.198263	0.21	0.886	78.5714	35.7143
Juxtacribrilinamutabilis	1	0.598	0.598	NA	0.598	0.598	100	0
AcartiaAcanthacartiatonsa	27	0.591684	0.593	0.046581	0.501	0.669	100	0
Marenzellerianeglecta	11	0.569333	0.6065	0.228688	0.214	0.792	50	0
Fenestrulinadelicia	6	0.5602	0.578	0.062986	0.452	0.604	80	0
Pseudocalanusacuspes	8	0.51175	0.5035	0.223394	0.267	0.773	50	0
Streblospiobenedicti	3	0.4155	0.4155	0.369817	0.154	0.677	50	0
ApionsomaApionsomamisakianum	1	0.263	0.263	NA	0.263	0.263	0	0
Mnemiopsisleidyi	4	0.241	0.241	NA	0.241	0.241	0	0

## Sheet: analysis results all species co
Article title	The role of genetic observatory networks in the detection and forecasting of marine non-indigenous species
Journal	Nature Communications
Authors	Justine Pagnier, Tobias Andermann, Mats Gunnar Andersson, Matthias Obst
Corresponding author	Justine Pagnier, Department of Marine Sciences, SciLifeLab, University of Gothenburg, justine.pagnier@gu.se
metric	value
Total detections (with finite suitability)	156
Mean suitability across all detections	0.733 +/- 0.167
Detections in unsuitable areas (< 0.5)	16
Detections in suitable areas (>= 0.5)	140
Detections in highly suitable areas (>= 0.8)	73
Percentage in unsuitable areas (< 0.5)	10.26
Percentage in suitable areas (>= 0.5)	89.74
Percentage in highly suitable areas (>= 0.8)	46.79
