# Supplementary material for: The role of genetic observatory networks in the detection and forecasting of marine non-indigenous species
Source: Research Square preprint supplement (doi:10.21203/rs.3.rs-8702791/v1), 2026-01-30
Supplement: Supplementary file 3 [file 87865a5abee90ef583aea021.xlsx]

## Sheet: NIS lists from ARMSMBON & SPM
Article title	The role of genetic observatory networks in the detection and forecasting of marine non-indigenous species
Journal	Nature Communications
Authors	Justine Pagnier, Tobias Andermann, Mats Gunnar Andersson, Matthias Obst
Corresponding author	Justine Pagnier, Department of Marine Sciences, SciLifeLab, University of Gothenburg, justine.pagnier@gu.se
ARMS MBON	SPM 2023	SPM 2024
Acartia (Acanthacartia) tonsa	Acartia (Acanthacartia) tonsa	Acartia (Acanthacartia) tonsa
Amphibalanus amphitrite	Amphibalanus improvisus	Amphibalanus improvisus
Amphibalanus eburneus	Gammarus tigrinus	Arcuatula senhousia
Amphibalanus improvisus	Marenzelleria arctia	Austrominius modestus
Apionsoma (Apionsoma) misakianum	Marenzelleria neglecta	Corambe obscura
Arcuatula senhousia	Marenzelleria viridis	Cordylophora caspia
Ascidiella aspersa	Potamopyrgus antipodarum	Crepidula fornicata
Asparagopsis armata	Rangia cuneata	Dasysiphonia japonica
Asparagopsis taxiformis		Ensis leei
Aurelia solida		Euphysa tentaculata
Austrominius modestus		Evadne anonyx
Balanus trigonus		Ficopomatus enigmaticus
Boccardia proboscidea		Gammarus tigrinus
Bonnemaisonia hamifera		Haminella solitaria
Botrylloides violaceus		Hemigrapsus takanoi
Bugula neritina		Juxtacribrilina mutabilis
Caprella mutica		Marenzelleria arctia
Caprella scaura		Marenzelleria neglecta
Celleporaria brunnea		Marenzelleria viridis
Cephalothrix simula		Melanothamnus harveyi
Cordylophora caspia		Mnemiopsis leidyi
Corella eumyota		Monocorophium acherusicum
Crepidula fornicata		Mytilicola orientalis
Cutleria multifida		Neogobius melanostomus
Dasysiphonia japonica		Oithona davisae
Eucheilota menoni		Parathalestris harpactoides
Fenestrulina delicia		Polydora websteri
Fibrocapsa japonica		Polysiphonia brodiei
Ficopomatus enigmaticus		Potamopyrgus antipodarum
Gonionemus vertens		Pseudocalanus acuspes
Haloa japonica		Pseudocalanus mimus
Halothrix lumbricalis		Pseudodiaptomus marinus
Hemigrapsus takanoi		Rangia cuneata
Herdmania momus		Rhithropanopeus harrisii
Hydroides elegans		Rhodochorton tenue
Monocorophium sextonae		Schizoporella japonica
Neogobius melanostomus		Sinelobus vanhaareni
Oithona davisae		Stylochus ellipticus
Ostreopsis ovata		Thalassiosira punctigera
Palaemon elegans		Tharyx setigera
Paracerceis sculpta
Paranthura japonica
Perophora japonica
Petricolaria pholadiformis
Pleurosira laevis
Polycerella emertoni
Polydora cornuta
Potamopyrgus antipodarum
Schizoporella japonica
Smittoidea prolifica
Streblospio benedicti
Telmatogeton japonicus
Torquigener flavimaculosus
Xenostrobus securis

## Sheet: combined and detailed
Article title	The role of genetic observatory networks in the detection and forecasting of marine non-indigenous species
Journal	Nature Communications
Authors	Justine Pagnier, Tobias Andermann, Mats Gunnar Andersson, Matthias Obst
Corresponding author	Justine Pagnier, Department of Marine Sciences, SciLifeLab, University of Gothenburg, justine.pagnier@gu.se
Combined list (for GBIF/OBIS query)	detected in...	Native Range	Model created?	Number of models in the ensemble	Notes
Acartia tonsa	ARMS MBON + SPM	Indo-Pacific	yes	14
Amphibalanus amphitrite	ARMS MBON	Indo-Pacific	yes	73
Amphibalanus eburneus	ARMS MBON	Western Atlantic	yes	55
Amphibalanus improvisus	ARMS MBON + SPM	Atlantic and Gulf coasts of North America, ranging South to South America	yes	75
Apionsoma misakianum	ARMS MBON	Indo Pacific	yes	11
Arcuatula senhousia	ARMS MBON + SPM	West Pacific	yes	54
Ascidiella aspersa	ARMS MBON	North Sea (considered alien in Mediterranean Sea)	yes	75
Asparagopsis armata	ARMS MBON	southern Australia and New Zealand	yes	75
Asparagopsis taxiformis	ARMS MBON	Japan	yes	32
Aurelia solida	ARMS MBON	Indian Ocean/Red Sea	yes	30
Austrominius modestus	ARMS MBON + SPM	NZ/Australia	yes	75
Balanus trigonus	ARMS MBON	Pacific&Indian Ocean	yes	68
Boccardia proboscidea	ARMS MBON	West coast of North America and Japan	yes	17
Bonnemaisonia hamifera	ARMS MBON + SPM	North-West Pacific Ocean	yes	75
Botrylloides violaceus	ARMS MBON	North-West Pacific Ocean	yes	75
Bugula neritina	ARMS MBON	uncertain but considered NIS in Europe	yes	70
Caprella mutica	ARMS MBON	North-East Asia	yes	75
Caprella scaura	ARMS MBON	Indo-Pacific	yes	21
Celleporaria brunnea	ARMS MBON	Pacific coast of North-America	no	NA	not enough occurrences in training extent
Cephalothrix simula	ARMS MBON	Northwest Pacific Ocean	no	NA	not enough occurrences in training extent
Corambe obscura	SPM	North-West Atlantic	yes	43
Cordylophora caspia	ARMS MBON + SPM	Black & Caspian Sea	yes	74
Corella eumyota	ARMS MBON	Circum-Antarctic, South Pacific, Antarctic seas	yes	73
Crepidula fornicata	ARMS MBON + SPM	North-West Atlantic	yes	75
Cutleria multifida	ARMS MBON	North Sea (considered alien in Mediterranean Sea)	yes	73
Dasysiphonia japonica	ARMS MBON + SPM	Pacific Ocean	yes	74
Ensis leei	SPM	North-West Atlantic	yes	75
Eucheilota menoni	ARMS MBON	Indo-Pacific	no	NA	not enough occurrences in training extent
Euphysa tentaculata	SPM	Barents Sea? North Canada? Detected in Norway in 2015	no	NA	not enough occurrences in training extent
Evadne anonyx	SPM	Black & Caspian Sea	yes	41
Fenestrulina delicia	ARMS MBON	unknown but discovered in the US	yes	46
Fibrocapsa japonica	ARMS MBON	North-West Pacific Ocean	yes	27
Ficopomatus enigmaticus	ARMS MBON + SPM	Australia	yes	33
Gammarus tigrinus	SPM	Atlantic coast of North America	yes	72
Gonionemus vertens	ARMS MBON	North Pacific Ocean	yes	33
Haloa japonica	ARMS MBON	Northwest Pacific (Japan)	yes	31
Halothrix lumbricalis	ARMS MBON	Northwest Pacific	no	NA	not enough occurrences in training extent
Haminella solitaria	ARMS MBON + SPM	North America	yes	33
Hemigrapsus takanoi	ARMS MBON + SPM	North-West Pacific Ocean	yes	73
Herdmania momus	ARMS MBON	Red Sea	yes	7
Hydroides elegans	ARMS MBON	Australia	yes	37
Juxtacribrilina mutabilis	ARMS MBON + SPM	North-West Pacific Ocean	yes	31
Marenzelleria arctia	ARMS MBON + SPM	Arctic	yes	18
Marenzelleria neglecta	SPM	NW Atlantic	yes	74
Marenzelleria viridis	SPM	Atlantic coast of North America	yes	62
Melanothamnus harveyi	SPM	Japan	yes	43
Mnemiopsis leidyi	SPM	West Atlantic	yes	75
Monocorophium acherusicum	SPM	North-East Atlantic (invasive in Baltic Sea)	yes	64
Monocorophium sextonae	ARMS MBON	New Zealand?	yes	74
Mytilicola orientalis	SPM	Pacific NW	no	NA	not enough occurrences in training extent
Neogobius melanostomus	ARMS MBON + SPM	Black & Caspian Sea	yes	73
Oithona davisae	SPM	West Atlantic	yes	24
Ostreopsis ovata	ARMS MBON	South America	yes	30
Palaemon elegans	ARMS MBON	North-East Atlantic (invasive in Baltic Sea)	yes	75
Paracerceis sculpta	ARMS MBON	Southern California and the Pacific Coast of Mexico	yes	22
Paranthura japonica	ARMS MBON	North West Pacific (East of US)	no	NA	not enough occurrences in training extent
Parathalestris harpactoides	SPM	North-East Atlantic (invasive in Baltic Sea)	no	NA	not enough occurrences in training extent
Perophora japonica	ARMS MBON	northwest Pacific	yes	50
Petricolaria pholadiformis	ARMS MBON	North West Pacific (East of US)	yes	75
Pleurosira laevis	ARMS MBON	North-East Atlantic (invasive in Baltic Sea)	no	NA	not enough occurrences in training extent
Polycerella emertoni	ARMS MBON	North America	no	NA	not enough occurrences in training extent
Polydora cornuta	ARMS MBON	North America	yes	75
Polydora websteri	SPM	Asia	yes	31
Polysiphonia brodiei	SPM	Found in Europe but not in the Baltic	yes	71
Potamopyrgus antipodarum	SPM	New Zealand	yes	75
Pseudocalanus acuspes	SPM	normally present in the baltic	yes	4
Pseudocalanus mimus	SPM	North Pacific Ocean	yes	26
Pseudodiaptomus marinus	SPM	Northwest Pacific	yes	47
Rangia cuneata	SPM	West Atlantic	yes	74
Rhithropanopeus harrisii	SPM	West Atlantic	yes	75
Rhodochorton tenue	SPM	East Pacific	yes	71
Schizoporella japonica	ARMS MBON + SPM	China/Japan	yes	66
Sinelobus vanhaareni	SPM	North America	yes	61
Smittoidea prolifica	ARMS MBON	Pacific	no	NA	not enough occurrences in training extent
Streblospio benedicti	ARMS MBON	Gulf of Mexico W Tropical Atlantic	yes	61
Stylochus ellipticus	SPM	Pacific	no	NA	not enough occurrences in training extent
Telmatogeton japonicus	ARMS MBON	Pacific (Japan)	yes	27
Thalassiosira punctigera	SPM	Origin unknown,possibly North Pacific. Described from the Sea of ​​Japan (1886)	yes	38
Tharyx setigera	SPM	Eastern Central Pacific, Western Atlantic and the Arctic: Central America to northern Brazil.	yes	7
Torquigener flavimaculosus	ARMS MBON	W Indian Ocean	yes	59
Xenostrobus securis	ARMS MBON	Pacific	yes	24
