# Supplementary material for: The role of genetic observatory networks in the detection and forecasting of marine non-indigenous species
Source: Research Square preprint supplement (doi:10.21203/rs.3.rs-8702791/v1), 2026-01-30
Supplement: Supplementary file 4 [file a993364f653518df2a8ad620.xlsx]

## Sheet: occurrences tracker
Article title	The role of genetic observatory networks in the detection and forecasting of marine non-indigenous species
Journal	Nature Communications
Authors	Justine Pagnier, Tobias Andermann, Mats Gunnar Andersson, Matthias Obst
Corresponding author	Justine Pagnier, Department of Marine Sciences, SciLifeLab, University of Gothenburg, justine.pagnier@gu.se
species	occurrences downloaded from gbif	DOI GBIF	occurrences from gbif post curation	occurrences downloaded from obis	merged and deduplicated	spatially thinned (10km)	total after biomod formatting	pseudo absences per rep (n.rep=3)	PA disk	PA random
Acartia tonsa	4433	https://doi.org/10.15468/dl.b8wgpk	409	1414	1700	368	257	771	386	385
Amphibalanus amphitrite	2782	https://doi.org/10.15468/dl.w3f296	870	250	1052	373	178	534	267	267
Amphibalanus eburneus	697	https://doi.org/10.15468/dl.w75efx	190	58	234	145	55	165	83	82
Amphibalanus improvisus	66540	https://doi.org/10.15468/dl.tdg76r	49257	6055	52439	1309	847	2541	1271	1270
Apionsoma misakianum	167	https://doi.org/10.15468/dl.z3actd	16	30	40	29	19	57	29	28
Arcuatula senhousia	3704	https://doi.org/10.15468/dl.qhns7z	970	400	1170	181	85	255	128	127
Ascidiella aspersa	9038	https://doi.org/10.15468/dl.vw853w	4108	5050	9095	836	570	1710	855	855
Asparagopsis armata	7607	https://doi.org/10.15468/dl.hf4jk3	2649	1081	3645	494	294	882	441	441
Asparagopsis taxiformis	5237	https://doi.org/10.15468/dl.pbfanc	974	311	1130	457	270	810	405	405
Aurelia solida	202	https://doi.org/10.15468/dl.hnqwzf	146	6	152	48	28	84	42	42
Austrominius modestus	10716	https://doi.org/10.15468/dl.j9axxu	4214	3677	7812	646	334	1002	501	501
Balanus trigonus	1995	https://doi.org/10.15468/dl.64zpr9	593	144	685	285	134	402	201	201
Boccardia proboscidea	341	https://doi.org/10.15468/dl.bmnduh	33	19	50	23	10	30	15	15
Bonnemaisonia hamifera	7088	https://doi.org/10.15468/dl.2r3qnd	1205	1532	2576	496	314	942	471	471
Botrylloides violaceus	2812	https://doi.org/10.15468/dl.uze5sr	1721	597	2191	478	258	774	387	387
Bugula neritina	3156	https://doi.org/10.15468/dl.v9ngnx	800	517	1180	344	167	501	251	250
Caprella mutica	2078	https://doi.org/10.15468/dl.krgc6r	876	505	1253	401	228	684	342	342
Caprella scaura	1059	https://doi.org/10.15468/dl.jrgvr6	40	9	47	29	14	42	21	21
Celleporaria brunnea	335	https://doi.org/10.15468/dl.46f7en	22	11	32	14	7	NA	NA	NA
Cephalothrix simula	15	https://doi.org/10.15468/dl.3682b8	6	5	8	7	5	NA	NA	NA
Corambe obscura	197	https://doi.org/10.15468/dl.6qzmdx	60	7	62	32	18	54	27	27
Cordylophora caspia	6619	https://doi.org/10.15468/dl.f83pzx	5428	678	5817	454	296	888	444	444
Corella eumyota	1638	https://doi.org/10.15468/dl.uxs8ry	793	465	1222	225	118	354	177	177
Crepidula fornicata	28523	https://doi.org/10.15468/dl.k6yrww	15205	7450	22562	1279	829	2487	1244	1243
Cutleria multifida	2019	https://doi.org/10.15468/dl.2edk6v	314	568	873	251	174	522	261	261
Dasysiphonia japonica	2437	https://doi.org/10.15468/dl.rcsx5s	843	572	1271	325	215	645	323	322
Ensis leei	19585	https://doi.org/10.15468/dl.8tdsmm	10739	2012	12710	941	605	1815	908	907
Eucheilota menoni	29	https://doi.org/10.15468/dl.2sqdnu	5	2	7	6	2	NA	NA	NA
Euphysa tentaculata	4	https://doi.org/10.15468/dl.8s5pau	1	5	6	6	4	NA	NA	NA
Evadne anonyx	53	https://doi.org/10.15468/dl.kka3zp	30	258	274	134	100	300	150	150
Fenestrulina delicia	31	https://doi.org/10.15468/dl.5n6jem	22	71	93	36	29	87	44	43
Fibrocapsa japonica	883	https://doi.org/10.15468/dl.f72tzm	182	180	348	213	142	426	213	213
Ficopomatus enigmaticus	1532	https://doi.org/10.15468/dl.rwwky4	566	370	912	180	51	153	77	76
Gammarus tigrinus	21015	https://doi.org/10.15468/dl.vmdsm8	5661	958	6123	594	125	375	188	187
Gonionemus vertens	365	https://doi.org/10.15468/dl.4hkc3b	247	16	262	108	63	189	95	94
Haloa japonica	1012	https://doi.org/10.15468/dl.9vuvcs	379	66	438	52	18	54	27	27
Halothrix lumbricalis	138	https://doi.org/10.15468/dl.vrjyjc	2	5	5	4	3	NA	NA	NA
Haminella solitaria	271	https://doi.org/10.15468/dl.85zttd	59	30	80	41	29	87	44	43
Hemigrapsus takanoi	2395	https://doi.org/10.15468/dl.6yk89b	1769	252	1994	263	132	396	198	198
Herdmania momus	782	https://doi.org/10.15468/dl.sans78	129	75	193	81	44	132	66	66
Hydroides elegans	921	https://doi.org/10.15468/dl.rp9bpy	176	216	358	133	75	225	113	112
Juxtacribrilina mutabilis	270	https://doi.org/10.15468/dl.ffhffb	56	12	60	29	17	51	26	25
Marenzelleria arctia	106	https://doi.org/10.15468/dl.j3d9ac	9	14	22	21	15	45	23	22
Marenzelleria neglecta	1762	https://doi.org/10.15468/dl.5z5c2w	1103	849	1567	216	155	465	233	232
Marenzelleria viridis	699	https://doi.org/10.15468/dl.2vdj9q	167	1666	1731	359	231	693	347	346
Melanothamnus harveyi	2877	https://doi.org/10.15468/dl.khp32r	218	121	331	133	67	201	101	100
Mnemiopsis leidyi	5406	https://doi.org/10.15468/dl.ax2zhw	2806	1454	3984	923	493	1479	740	739
Monocorophium acherusicum	1733	https://doi.org/10.15468/dl.zyuy8v	347	832	1066	242	131	393	197	196
Monocorophium sextonae	1313	https://doi.org/10.15468/dl.5axf8x	297	1462	1746	296	218	654	327	327
Mytilicola orientalis	72	https://doi.org/10.15468/dl.um93mb	26	43	50	13	4	NA	NA	NA
Neogobius melanostomus	56851	https://doi.org/10.15468/dl.yuedbt	10135	3847	13861	1807	383	1149	575	574
Oithona davisae	1005	https://doi.org/10.15468/dl.np247u	69	152	203	70	42	126	63	63
Ostreopsis ovata	319	https://doi.org/10.15468/dl.d7uvsw	104	57	160	106	57	171	86	85
Palaemon elegans	6532	https://doi.org/10.15468/dl.sskmbu	4234	836	4888	1383	798	2394	1197	1197
Paracerceis sculpta	316	https://doi.org/10.15468/dl.p86dcu	61	17	76	33	14	42	21	21
Paranthura japonica	267	https://doi.org/10.15468/dl.zcuhsr	20	9	27	15	7	NA	NA	NA
Parathalestris harpactoides	34	https://doi.org/10.15468/dl.kgx9cw	0	10	10	4	1	NA	NA	NA
Perophora japonica	408	https://doi.org/10.15468/dl.gkjkpn	280	134	409	72	46	138	69	69
Petricolaria pholadiformis	12451	https://doi.org/10.15468/dl.ggyqg3	5823	733	6537	492	305	915	458	457
Pleurosira laevis	323	https://doi.org/10.15468/dl.zrsbr6	68	14	82	62	7	NA	NA	NA
Polycerella emertoni	40	https://doi.org/10.15468/dl.96swku	7	1	8	6	4	NA	NA	NA
Polydora cornuta	2803	https://doi.org/10.15468/dl.rwbsm7	488	3887	4270	489	290	870	435	435
Polydora websteri	411	https://doi.org/10.15468/dl.uweh8c	18	13	31	25	11	33	17	16
Polysiphonia brodiei	1753	https://doi.org/10.15468/dl.26mqes	287	284	468	174	118	354	177	177
Potamopyrgus antipodarum	159929	https://doi.org/10.15468/dl.4g6r6u	25320	2637	26614	4150	481	1443	722	721
Pseudocalanus acuspes	2448	https://doi.org/10.15468/dl.kf2aaw	275	206	390	184	161	483	242	241
Pseudocalanus mimus	836	https://doi.org/10.15468/dl.texryd	178	345	443	182	93	279	140	139
Pseudodiaptomus marinus	282	https://doi.org/10.15468/dl.k25fp9	56	96	143	52	38	114	57	57
Rangia cuneata	4326	https://doi.org/10.15468/dl.grt2e3	2188	5947	7728	387	116	348	174	174
Rhithropanopeus harrisii	3468	https://doi.org/10.15468/dl.63nq44	2146	446	2444	385	168	504	252	252
Rhodochorton tenue	4	https://doi.org/10.15468/dl.9v27jc	0	693	693	198	147	441	221	220
Schizoporella japonica	395	https://doi.org/10.15468/dl.64e9jg	183	204	303	125	66	198	99	99
Sinelobus vanhaareni	266	https://doi.org/10.15468/dl.p3mprg	138	135	244	57	40	120	60	60
Smittoidea prolifica	74	https://doi.org/10.15468/dl.dtypqn	5	7	11	6	3	NA	NA	NA
Streblospio benedicti	2146	https://doi.org/10.15468/dl.gwy2nn	492	2266	2405	189	94	282	141	141
Stylochus ellipticus	56	https://doi.org/10.15468/dl.vfaeaj	8	0	8	8	4	NA	NA	NA
Telmatogeton japonicus	146	https://doi.org/10.15468/dl.w4v6wy	95	21	116	42	24	72	36	36
Thalassiosira punctigera	572	https://doi.org/10.15468/dl.6qrzah	122	421	539	204	158	474	237	237
Tharyx setigera	53	https://doi.org/10.15468/dl.3dhqt4	2	109	111	70	64	192	96	96
Torquigener flavimaculosus	524	https://doi.org/10.15468/dl.8ag8g8	305	155	441	133	67	201	101	100
Xenostrobus securis	1533	https://doi.org/10.15468/dl.yse9nh	140	48	157	82	16	48	24	24
TOTAL	495260		169985	66110	226478	25745	12300
