# Supplementary material for: The role of genetic observatory networks in the detection and forecasting of marine non-indigenous species
Source: Research Square preprint supplement (doi:10.21203/rs.3.rs-8702791/v1), 2026-01-30
Supplement: Supplementary file 6 [file fe189c68d4b6e416d9cc5162.xlsx]

## Sheet: Sheet1
Article title	The role of genetic observatory networks in the detection and forecasting of marine non-indigenous species
Journal	Nature Communications
Authors	Justine Pagnier, Tobias Andermann, Mats Gunnar Andersson, Matthias Obst
Corresponding author	Justine Pagnier, Department of Marine Sciences, SciLifeLab, University of Gothenburg, justine.pagnier@gu.se
ecoregion	province	realm	latitude	longitude	n_cells	current_mean	current_median	current_sd	ssp126_mean	ssp126_median	ssp126_change_abs	ssp126_change_abs_sd	ssp126_change_pct	ssp126_change_pct_sd	ssp245_mean	ssp245_median	ssp245_change_abs	ssp245_change_abs_sd	ssp245_change_pct	ssp245_change_pct_sd	ssp585_mean	ssp585_median	ssp585_change_abs	ssp585_change_abs_sd	ssp585_change_pct	ssp585_change_pct_sd
Baltic Sea	Northern European Seas	Temperate Northern Atlantic	59.41	21.51	23705	0.1692	0.1366	0.1015	0.1843	0.1587	0.0151	0.0137	13.9525	12.054	0.196	0.1597	0.0267	0.0153	22.0877	16.6812	0.231	0.1955	0.0617	0.0238	46.2531	23.3094
Black Sea	Black Sea	Temperate Northern Atlantic	43.95	35.28	6718	0.2313	0.2249	0.1019	0.2195	0.2064	-0.0117	0.0129	-4.0546	5.7652	0.2238	0.2082	-0.0074	0.0223	-2.7209	8.6925	0.2389	0.2306	0.0076	0.017	1.5295	6.2175
Celtic Seas	Northern European Seas	Temperate Northern Atlantic	53.6	-8.2	23479	0.1167	0.0443	0.1439	0.1234	0.0577	0.0067	0.0169	17.7986	17.1854	0.1343	0.0745	0.0175	0.0224	38.6783	27.9362	0.1609	0.111	0.0441	0.0308	93.834	56.9888
Faroe Plateau	Northern European Seas	Temperate Northern Atlantic	62.62	-7.21	1836	0.0841	0.0451	0.0972	0.101	0.0596	0.0169	0.0089	30.5741	12.6693	0.1134	0.073	0.0293	0.0122	54.4899	20.6257	0.1426	0.1035	0.0585	0.0174	113.68	43.6677
South European Atlantic Shelf	Lusitanian	Temperate Northern Atlantic	42.41	-6.66	6042	0.1388	0.0628	0.1604	0.1436	0.0759	0.0048	0.0138	15.0791	13.8737	0.1548	0.0941	0.016	0.0201	36.9828	29.1054	0.1725	0.1166	0.0337	0.0272	76.5225	56.6002
North and East Iceland	Arctic	Arctic	68.85	-13.2	2182	0.0876	0.0492	0.0912	0.1066	0.0717	0.019	0.0149	38.8465	21.8494	0.1343	0.0946	0.0467	0.0169	79.4607	32.9878	0.1613	0.1236	0.0737	0.0162	129.445	50.2776
South and West Iceland	Northern European Seas	Temperate Northern Atlantic	63.43	-19.74	6698	0.1226	0.0656	0.1216	0.1343	0.0865	0.0117	0.0175	23.8114	21.0798	0.1603	0.1099	0.0377	0.0178	53.3284	27.5554	0.1864	0.1393	0.0638	0.0204	94.2954	48.9522
North Sea	Northern European Seas	Temperate Northern Atlantic	55.22	4.59	35793	0.1324	0.0612	0.1496	0.1328	0.0702	0.0004	0.0191	10.5492	14.7764	0.1467	0.0856	0.0143	0.0198	33.4742	27.0374	0.1756	0.1217	0.0433	0.0266	90.4114	65.5444
Southern Norway	Northern European Seas	Temperate Northern Atlantic	63.42	7.97	3784	0.2087	0.1804	0.1605	0.2209	0.208	0.0122	0.0178	17.1131	16.7218	0.2282	0.218	0.0195	0.0225	31.7379	32.9747	0.2591	0.2545	0.0504	0.0286	70.1922	68.1331
Northern Norway and Finnmark	Northern European Seas	Temperate Northern Atlantic	69.68	22.84	8024	0.1556	0.0951	0.1416	0.1737	0.121	0.0181	0.0138	22.6546	18.181	0.1897	0.1436	0.0341	0.0194	45.8593	31.4736	0.2279	0.19	0.0723	0.0252	104.383	71.5394
North and East Barents Sea	Arctic	Arctic	75.45	42.48	100743	0.0353	0.0237	0.0353	0.0552	0.0462	0.0199	0.0183	65.8585	57.6851	0.0755	0.0617	0.0402	0.0286	133.759	75.9279	0.1176	0.0952	0.0823	0.0402	301.573	135.477
Adriatic Sea	Mediterranean Sea	Temperate Northern Atlantic	43.53	16.03	4517	0.1788	0.1277	0.1284	0.1806	0.1308	0.0018	0.0131	4.4228	10.0416	0.1837	0.1389	0.0049	0.0175	10.0318	14.4446	0.2044	0.1602	0.0256	0.0147	28.2299	22.7016
Levantine Sea	Mediterranean Sea	Temperate Northern Atlantic	33.44	30.78	2240	0.2026	0.1785	0.1137	0.2046	0.1791	0.0019	0.0071	2.0015	4.7766	0.212	0.1912	0.0093	0.0131	9.204	10.6709	0.2236	0.2059	0.021	0.0182	18.5373	15.8139
Tunisian Plateau/Gulf of Sidra	Mediterranean Sea	Temperate Northern Atlantic	31.88	15.56	4614	0.1661	0.121	0.115	0.1676	0.1227	0.0015	0.0048	1.3485	4.2952	0.174	0.1373	0.0078	0.013	9.5581	9.3856	0.1915	0.1603	0.0253	0.02	27.2888	18.8394
Ionian Sea	Mediterranean Sea	Temperate Northern Atlantic	37.31	18.29	1714	0.1812	0.1323	0.1255	0.1893	0.143	0.0082	0.0062	7.2756	5.5594	0.1928	0.1493	0.0116	0.0131	14.7881	13.4973	0.2056	0.1677	0.0244	0.019	28.8447	24.273
Aegean Sea	Mediterranean Sea	Temperate Northern Atlantic	38.16	26.28	2968	0.2088	0.1916	0.1008	0.209	0.1944	0.0002	0.0142	1.7808	9.2798	0.2202	0.2102	0.0115	0.0177	10.4134	16.15	0.2337	0.2253	0.025	0.0157	17.7681	14.3859
Alboran Sea	Mediterranean Sea	Temperate Northern Atlantic	35.09	-2.65	510	0.2254	0.2172	0.1094	0.2188	0.21	-0.0066	0.0065	-2.2434	2.9969	0.2189	0.2139	-0.0065	0.0133	-0.0984	7.2247	0.2316	0.2313	0.0062	0.0242	10.3724	17.8179
Western Mediterranean	Mediterranean Sea	Temperate Northern Atlantic	39.35	6.33	4727	0.2048	0.1728	0.1249	0.2112	0.18	0.0063	0.01	5.2678	7.7196	0.2095	0.1787	0.0047	0.0174	8.6962	13.472	0.2243	0.1975	0.0195	0.0246	21.5842	22.8633
